# Supplementary material for: Characterization and Evaluation of Rapamycin-Loaded Nano-Micelle Ophthalmic Solution
Source: MDPI journal article supplement (doi:10.3390/jfb14010049), 2023-01-16
Supplement: s1 [file s1]

# Characterization and Evaluation of Rapamycin-Loaded Nano-micelle Ophthalmic Solution

Ting Zhang<sup>1,2,3,†</sup>, Chao Wei<sup>2,†</sup>, Xianggen Wu<sup>4</sup>, Sai Zhang<sup>2</sup>, Fangnan Duan<sup>2</sup>, Xiaolin Qi<sup>1,2,3</sup>, Weiyun Shi<sup>1,2,3,\*</sup> and Hua Gao<sup>1,2,3,\*</sup>

<sup>1</sup> Eye Hospital of Shandong First Medical University (Shandong Eye Hospital), Eye Institute of Shandong First Medical University, Jinan 250021, China

<sup>2</sup> State Key Laboratory Cultivation Base, Shandong Provincial Key Laboratory of Ophthalmology, Eye Institute of Shandong First Medical University, Qingdao 266071, China

<sup>3</sup> School of Ophthalmology, Shandong First Medical University, Jinan 250021, China

<sup>4</sup> College of Chemical Engineering, Qingdao University of Science and Technology, Qingdao 266101, China

\* Correspondence: wyshi@sdfmu.edu.cn (W.S.); hgao@sdfmu.edu.cn (H.G.)

† These authors contributed equally to this work.

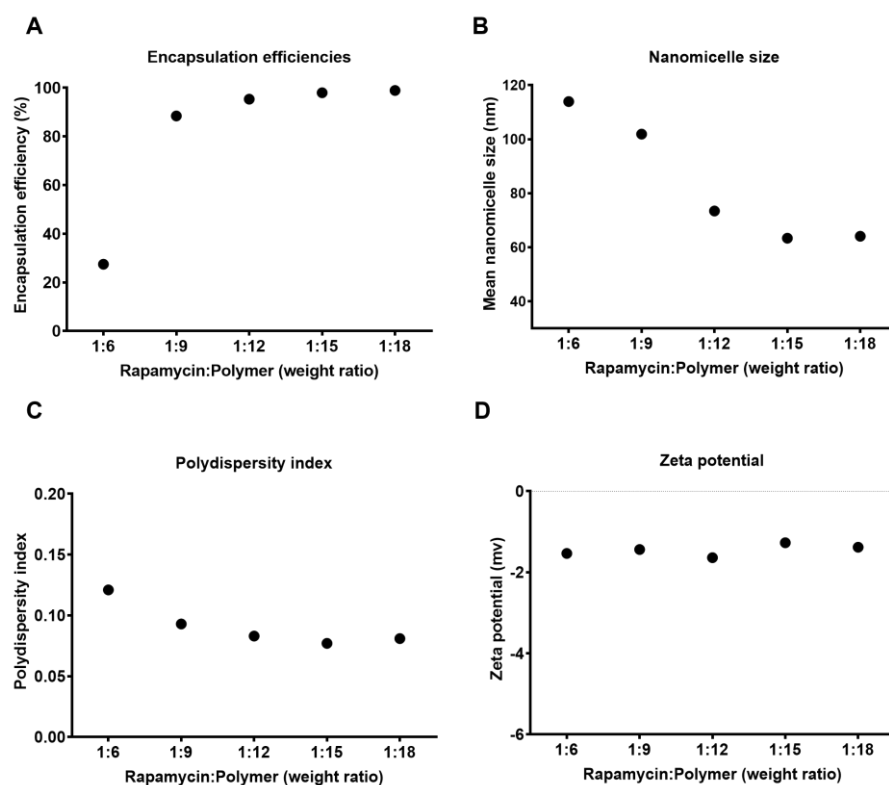

**Figure S1.** Characteristics of the RAPA-NM consisting of different weight ratios of PVCL-PVA-PEG/RAPA. (A) Encapsulation efficiencies, (B) nano-micelle size, (C) PDI, and (D) zeta potential.

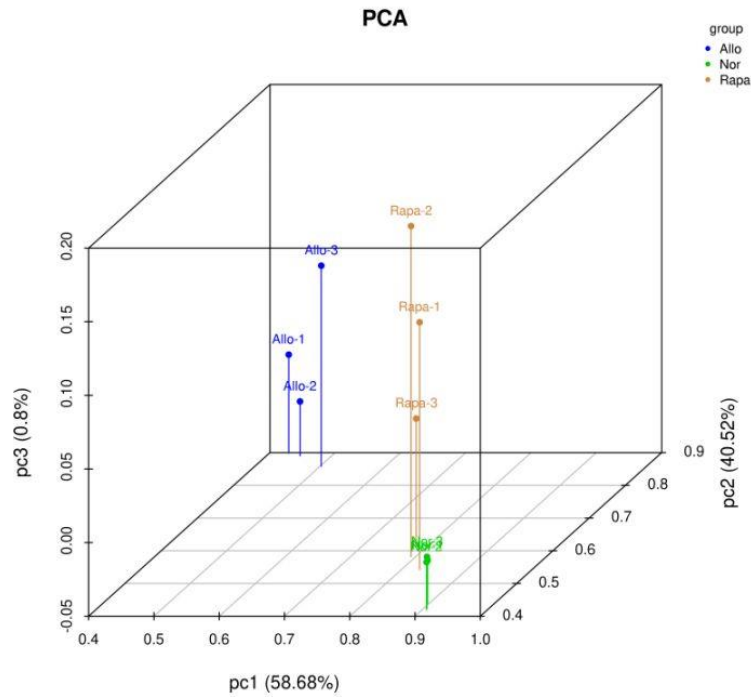

**Figure S2.** The PCA analysis. The samples obtained from the Nor, Allo and RAPA groups were separated into three clusters in the PCA image.

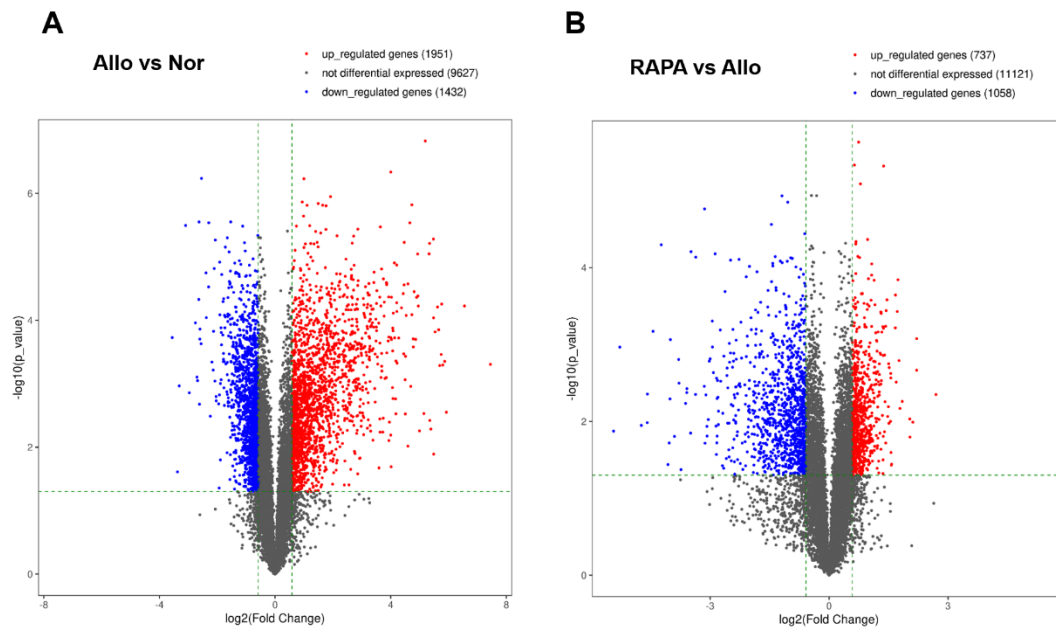

**Figure S3.** Number of DEGs in the cornea with a value of  $p < 0.05$  as shown in a volcano map. (A) Allo vs. Nor group. (B) RAPA vs. Allo group.
